# Supplementary material
Source: HighWire-hosted journal article supplement (http://dmd.aspetjournals.org/highwire/filestream/73894/field_highwire_adjunct_files/0/88732_Supporting_Information.pdf)
Supplement: 88732_Supporting_Information.pdf [file 88732_Supporting_Information.pdf]

## SUPPORTING INFORMATION

### Kinetic Modeling of Steady-State Situations in Cytochrome P450 Enzyme Reactions

F. Peter Guengerich

#### TABLE OF CONTENTS

|                 |                                                                                          |
|-----------------|------------------------------------------------------------------------------------------|
| <b>Fig. S1.</b> | Screenshots of KinTek Explorer® setup for the modeling in Fig. 1A.                       |
| <b>Fig. S2.</b> | Screenshot of KinTek Explorer® model for experiment of Fig. 1B.                          |
| <b>Fig. S3.</b> | Step $t_1$ for the reaction model (Fig. 1B) shown in Fig. S1.                            |
| <b>Fig. S4.</b> | Step $t_2$ for the reaction mode (Fig. 1B) shown in Fig. S1.                             |
| <b>Fig. S5.</b> | Observables (Analytic Fit option) for analyzing the reaction model (Fig. 1B) in Fig. S1. |
| <b>Fig. S6.</b> | Linear fitting of plots in Fig. S1.                                                      |
| <b>Fig. S7.</b> | Plot of <Rate vs. Conc> from rates obtained in Fig. S5 (Hyperbola).                      |
| <b>Fig. S8.</b> | Selected fit from Fig. S6 (following <Copy to Repository> in the step in Fig. S6).       |

Fig. S1

A

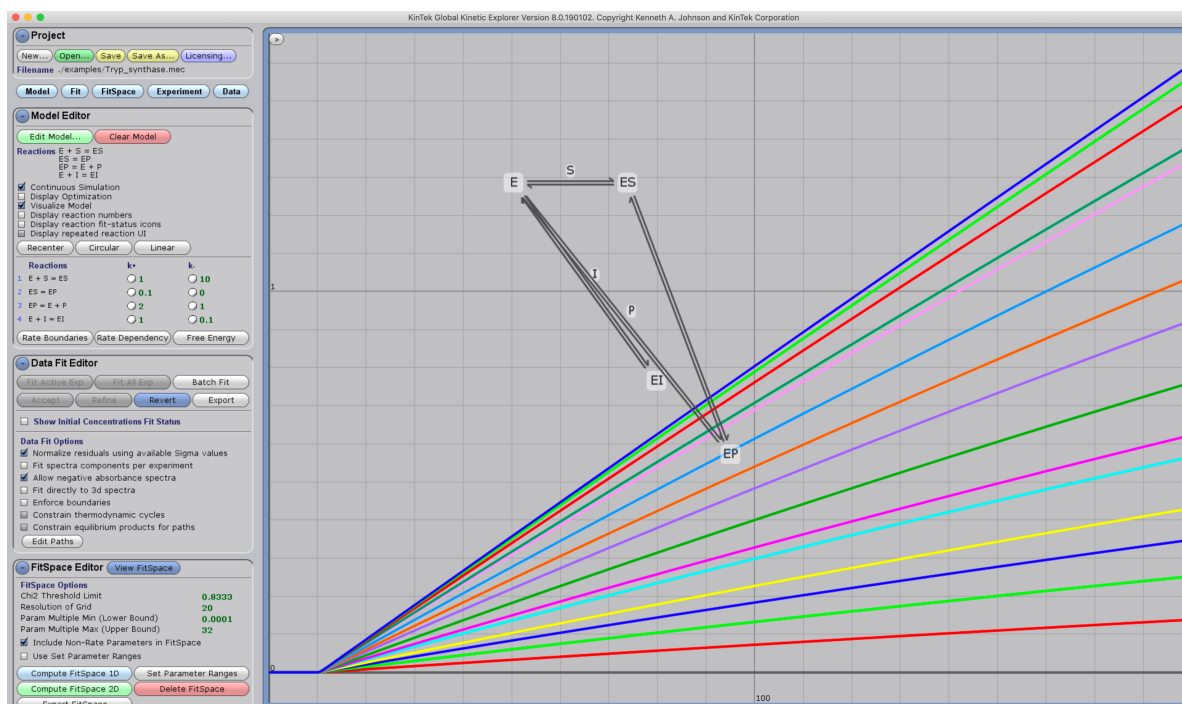

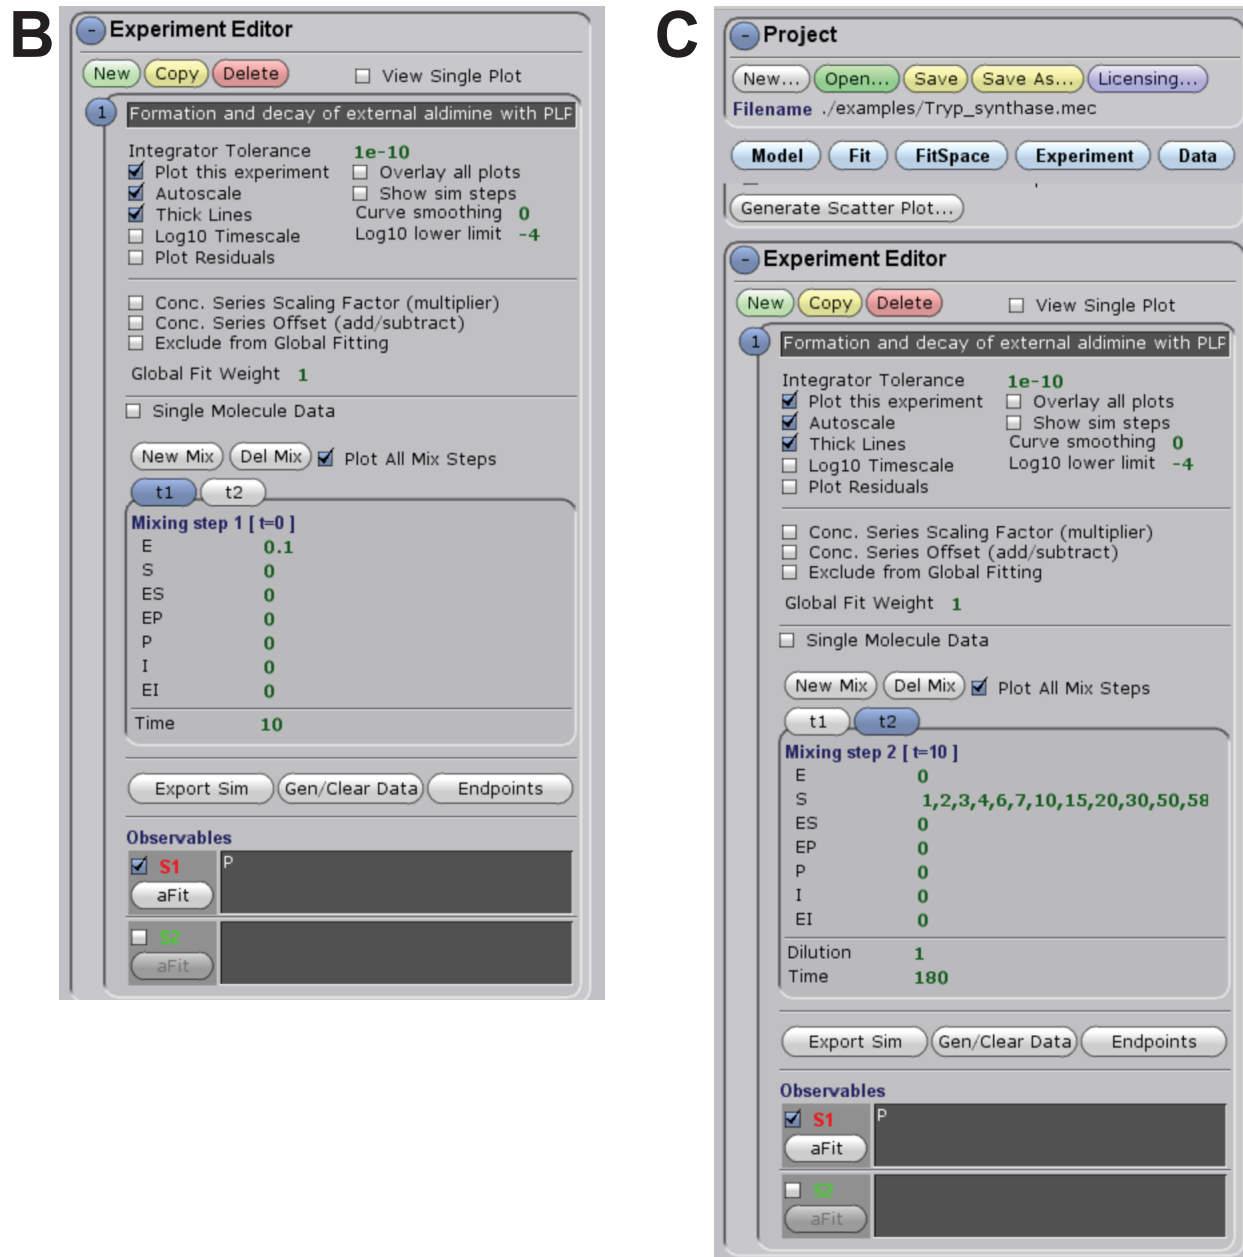

**Fig. S1.** Screenshot of KinTek Explorer® setup for the modeling in Fig. 1A. The three parts (A, B, C) show poses in the screen to indicate the basic setup.

Fig. S2

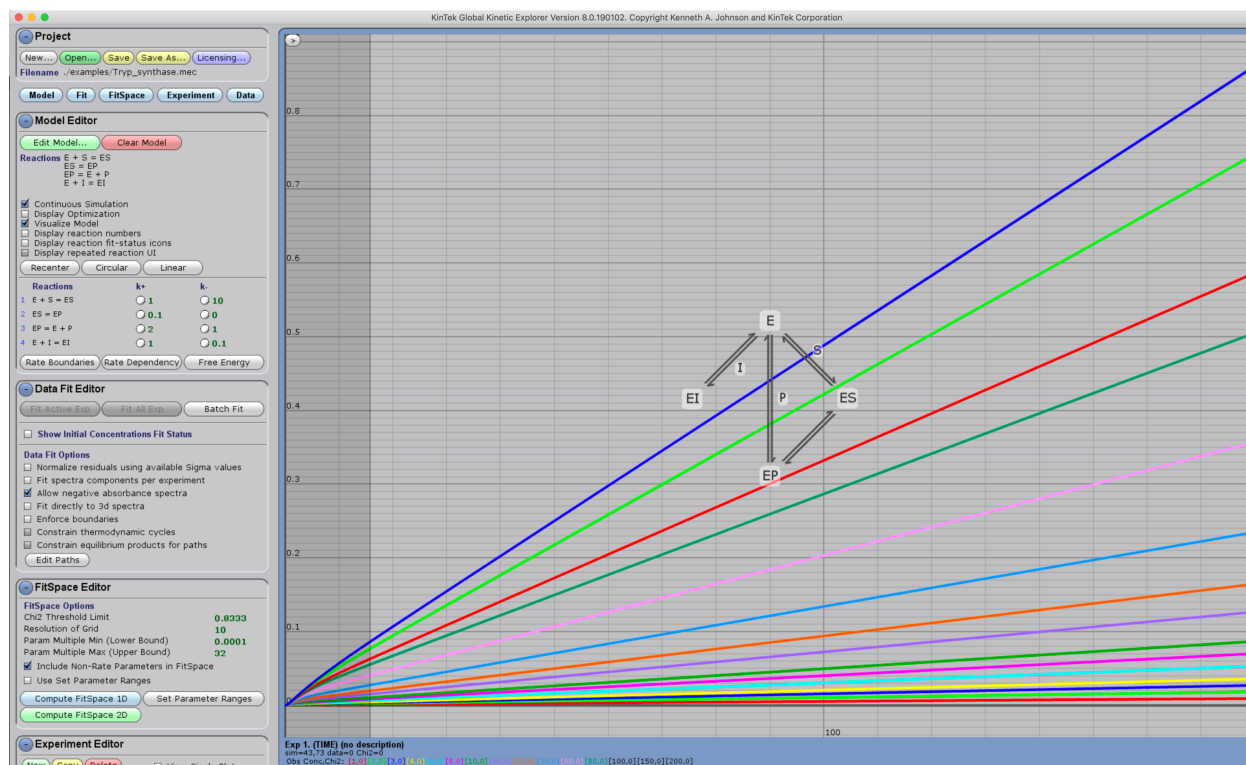

**Fig. S2.** Screenshot of KinTek Explorer® model for experiment of Fig. 1B. See parameters under Model Editor. Units are in  $\mu\text{M}$  and seconds ( $\text{s}^{-1}$  for first order reactions and  $\mu\text{M}^{-1} \text{s}^{-1}$  for second order reactions). A “=” symbol indicates a reversible reaction, and a back reaction rate constant of zero is used to make a reaction irreversible.

Fig. S3

**Experiment Editor**

New Copy Delete ☐ View Single Plot

1

Integrator Tolerance **1e-08**

☒ Plot this experiment ☐ Overlay all plots

☒ Autoscale ☐ Show sim steps

☒ Thick Lines Curve smoothing **0**

☐ Log10 Timescale Log10 lower limit **-3**

☐ Plot Residuals

☐ Conc. Series Scaling Factor (multiplier)

☐ Conc. Series Offset (add/subtract)

☐ Exclude from Global Fitting

Global Fit Weight **1**

☐ Single Molecule Data

New Mix Del Mix ☐ Plot All Mix Steps

t1 t2

**Mixing step 1 [ t=0 ]**

|      |            |
|------|------------|
| E    | <b>0.1</b> |
| S    | <b>0</b>   |
| ES   | <b>0</b>   |
| EP   | <b>0</b>   |
| P    | <b>0</b>   |
| I    | <b>2</b>   |
| EI   | <b>0</b>   |
| Time | <b>0.1</b> |

Export Sim Gen/Clear Data Endpoints

**Export Simulation**

Simulation Steps **200**

☒ Export Data Sigma

Export export ver p-2.7.14 m-2.2.0

**Reagent Endpoints**

|    |             |
|----|-------------|
| E  | 0.00495968  |
| S  | 0.990358    |
| ES | 0.000486325 |
| EP | 4.6844e-05  |
| P  | 0.00910839  |
| I  | 1.90549     |
| EI | 0.0945072   |

Export

**Observables**

☒ S1 P

aFit

☐ S2 I

aFit

Fig. S3. Step  $t_1$  for the reaction model (Fig. 1B) shown in Fig. S1.

Fig. S4

**Experiment Editor**

New Copy Delete ☐ View Single Plot

1

Integrator Tolerance **1e-08**

☒ Plot this experiment ☐ Overlay all plots

☒ Autoscale ☐ Show sim steps

☒ Thick Lines Curve smoothing **0**

☐ Log10 Timescale Log10 lower limit **-3**

☐ Plot Residuals

☐ Conc. Series Scaling Factor (multiplier)

☐ Conc. Series Offset (add/subtract)

☐ Exclude from Global Fitting

Global Fit Weight **1**

☐ Single Molecule Data

New Mix Del Mix ☐ Plot All Mix Steps

t1 t2

**Mixing step 2 [ t=0.1 ]**

|          |                                      |
|----------|--------------------------------------|
| E        | <b>0</b>                             |
| S        | <b>1,2,3,4,6,8,10,15,20,30,50,80</b> |
| ES       | <b>0</b>                             |
| EP       | <b>0</b>                             |
| P        | <b>0</b>                             |
| I        | <b>0</b>                             |
| EI       | <b>0</b>                             |
| Dilution | <b>1</b>                             |
| Time     | <b>180</b>                           |

Export Sim Gen/Clear Data Endpoints

**Export Simulation**

Simulation Steps **200**

☒ Export Data Sigma

Export export ver p-2.7.14 m-2.2.0

**Reagent Endpoints**

|    |             |
|----|-------------|
| E  | 0.00495968  |
| S  | 0.990358    |
| ES | 0.000486325 |
| EP | 4.6844e-05  |
| P  | 0.00910839  |
| I  | 1.90549     |
| EI | 0.0945072   |

Export

**Observables**

☒ S1 P

aFit

☐ S2 I

aFit

Fig. S4. Step  $t_2$  for the reaction mode (Fig. 1B) shown in Fig. S1.

**Observables**

☒ **S1** P

**Analytic Fit Options for S1**

Select Data to Fit:

☒ Fit to Simulated Observable

Select Analytic Function:

☒ Linear (a0,b)

☐ 1 Exp (a0,a1,b1)

☐ 2 Exp (a0,a1,b1,a2,b2)

☐ 3 Exp (a0,a1,b1,a2,b2,a3,b3)

☐ 4 Exp (a0,a1,b1,a2,b2,a3,b3,a4,b4)

☐ 1 Exp Burst (a0,a1,b1,b2)

☐ 2 Exp Burst (a0,a1,b1,a2,b2,b3)

☐ 3 Exp Burst (a0,a1,b1,a2,b2,a3,b3,b4)

☐ Polynomial of Degree

☐ Hyperbola (a0,a1,Kd)

☐ Michaelis (kcat, Km)

☐ Menten (kon,kcat)

☐ Quadratic (a0,a,Kd,E)

☐ Hill (a0,a,K,n)

☐ 2-Site (a0,a,K1,K2)

$$y = a_0 + b \cdot t$$

☐ Manage Initial Parameter Values

**Fig. S5.** Observables (Analytic Fit option) for analyzing the reaction model (Fig. 1B) in Fig. S1.

Fig. S6

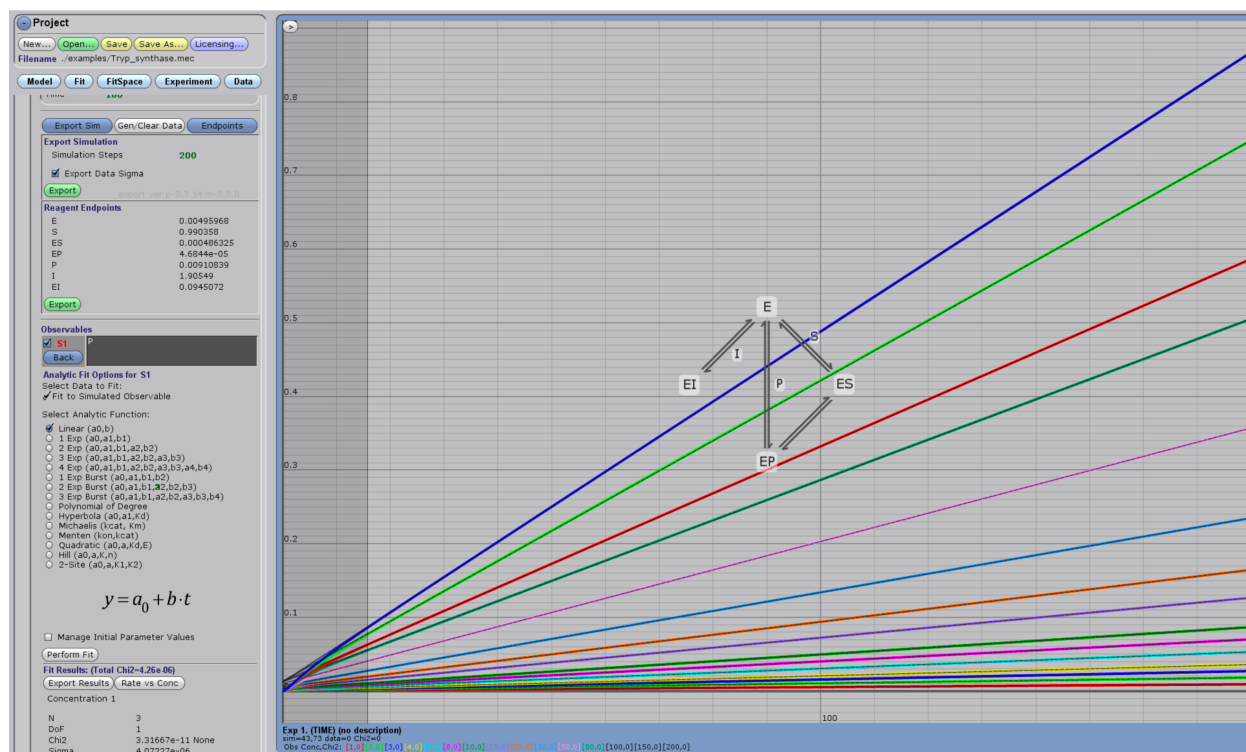

Fig. S6. Linear fitting of plots in Fig. S1.



Fig. S7

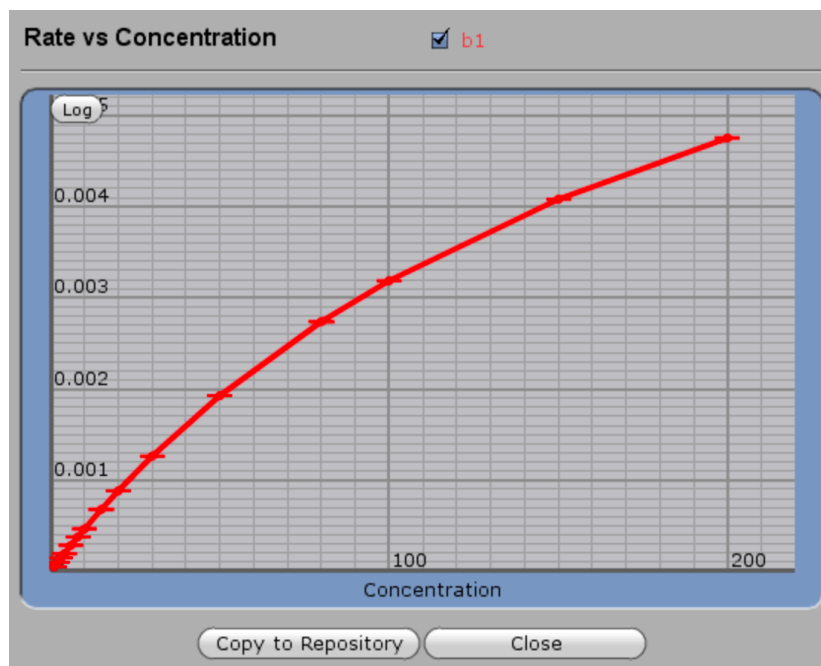

**Fig. S7.** Plot of <Rate vs. Conc> from rates obtained in Fig. S5 (Hyperbola). Alternatively <Michaelis> could have been selected to obtain the same result.

Fig. S8

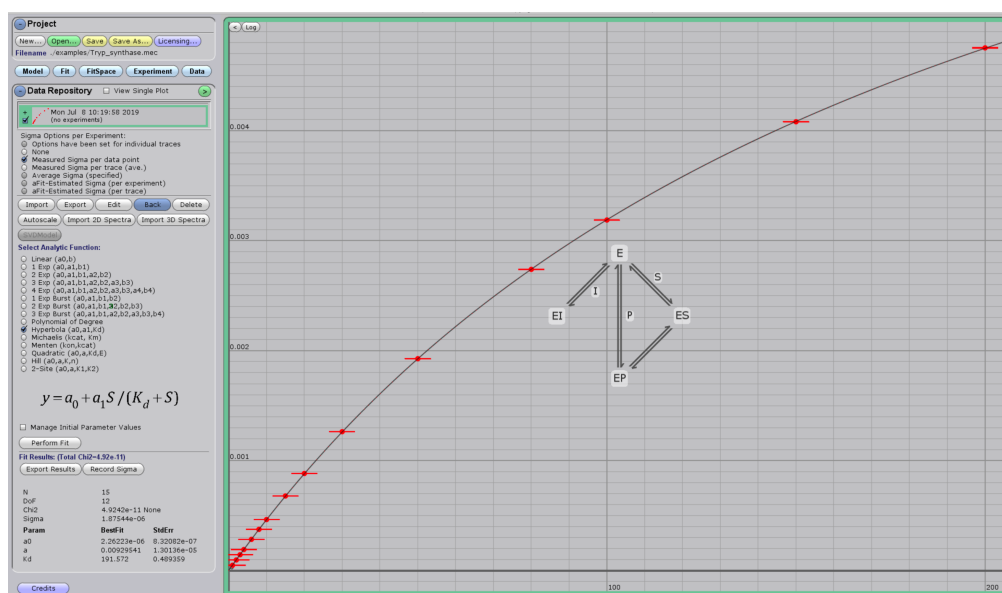

**Fig. S8.** Selected fit from Fig. S6 (following <Copy to Repository> in the step in Fig. S6).
